# Supplementary material
Source: ML conference proceedings conference paper supplement (https://openreview.net/forum?id=Xq2s5yxzd2)
Supplement: supplementary_material [file attachment]

## 404 A Implementation Details

405 For fair comparisons, we adopt a ResNet50 as our backbone on ImageCLEF and Office-Home and a  
 406 ResNet101 on DomainNet. The weights for ResNet50 and ResNet101 are from CLIP and frozen  
 407 through our experiments. Prompts and auto-encoder of MPA are trained using the mini-batch SGD  
 408 optimizer with a learning rate of 0.003 and 0.005 while in LST, the learned subspace is tuned with  
 409 a 0.0005 learning rate. We use a batch size of 32 and adopt a cosine learning rate scheduler. For  
 410 hyper-parameters, token lengths  $M_1$  and  $M_2$  are both set to 16. Pseudo-label threshold  $\tau$  is set to 0.4  
 411 for producing reliable labels.  $\alpha$  in Equation 7 is set to 500.

412 The projection function and the back projection function are implemented by:

$$\mathbf{Proj}(P_i) = \mathbf{W}_1(P_i) + b_1 \quad (9)$$

$$\mathbf{Proj}_b(v_I) = \mathbf{W}_3(\tanh(\mathbf{W}_2 v_I + b_1)) + b_2 \quad (10)$$

413 The weight matrix  $\mathbf{W}_2$  of the back projection function in Equation 10 has a size of  $\mathbb{R}^{384 \times d_I}$ , where  
 414  $d_I$  is 100 for ImageCLEF, 150 for OfficeHome and 250 for DomainNet. Therefore, for generalizing  
 415 to new target domains using LST, only 0.02M, 0.17M, and 1.47M parameters are tuned respectively.
